# Supplementary material for: Synthesis, photochromic properties and thermal bleaching kinetics of pyrazolone phenylsemicarbazones containing a thiophene ring
Source: Royal Society of Chemistry journal article supplement (doi:10.1039/c3nj00241a), 2013-01-01
Supplement: c3nj00241a.pdf [file c3nj00241a.pdf]

## **Electronic Supplementary Information (ESI)**

# **Synthesis, Photochromic Properties and Thermal Bleaching Kinetics of Pyrazolone Phenylsemicarbazones Containing a Thiophene Ring**

**Hubin Sun, Lang Liu\*, Dongling Wu, Dianzeng Jia\* and Jixi Guo**

Key Laboratory of Material and Technology for Clean Energy, Ministry of Education; Key Laboratory of Advanced Functional Materials, Autonomous Region; Institute of Applied Chemistry, Xinjiang University. Urumqi 830046, Xinjiang, China.

Fax: +86-991-8588883 E-mail: liulang@xju.edu.cn; jdz@xju.edu.cn.

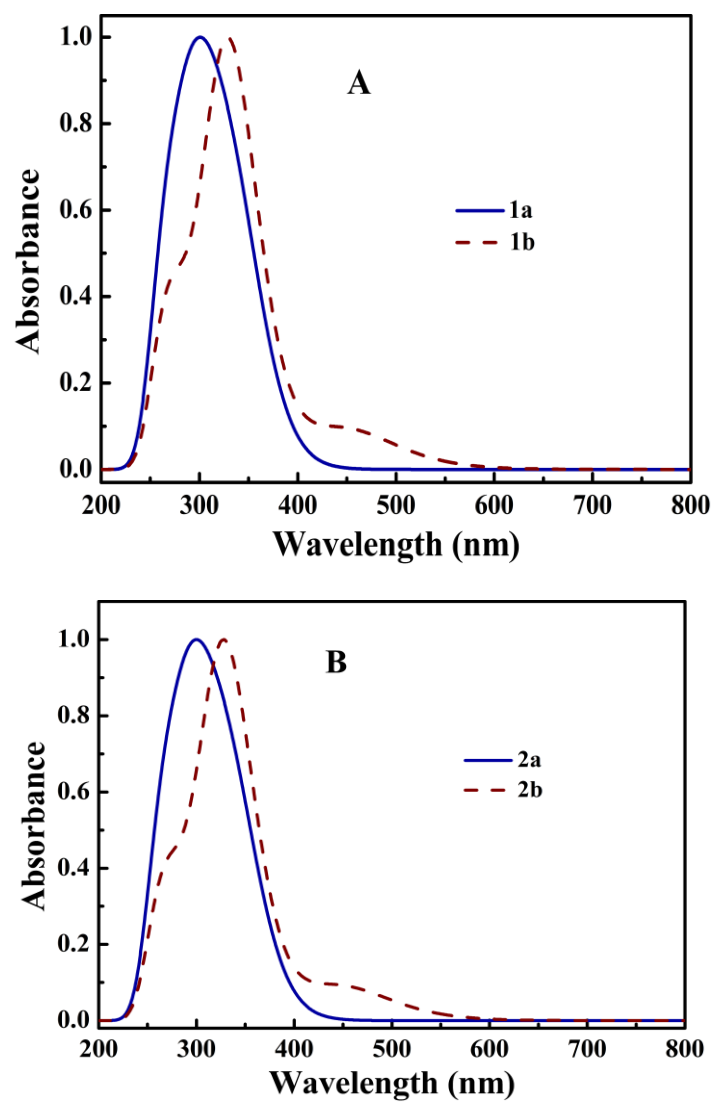

**Figure S1.** Absorption spectra of 1(A) and 2(B) by TDDFT calculations at the b3lyp/6-31+g(d) level.

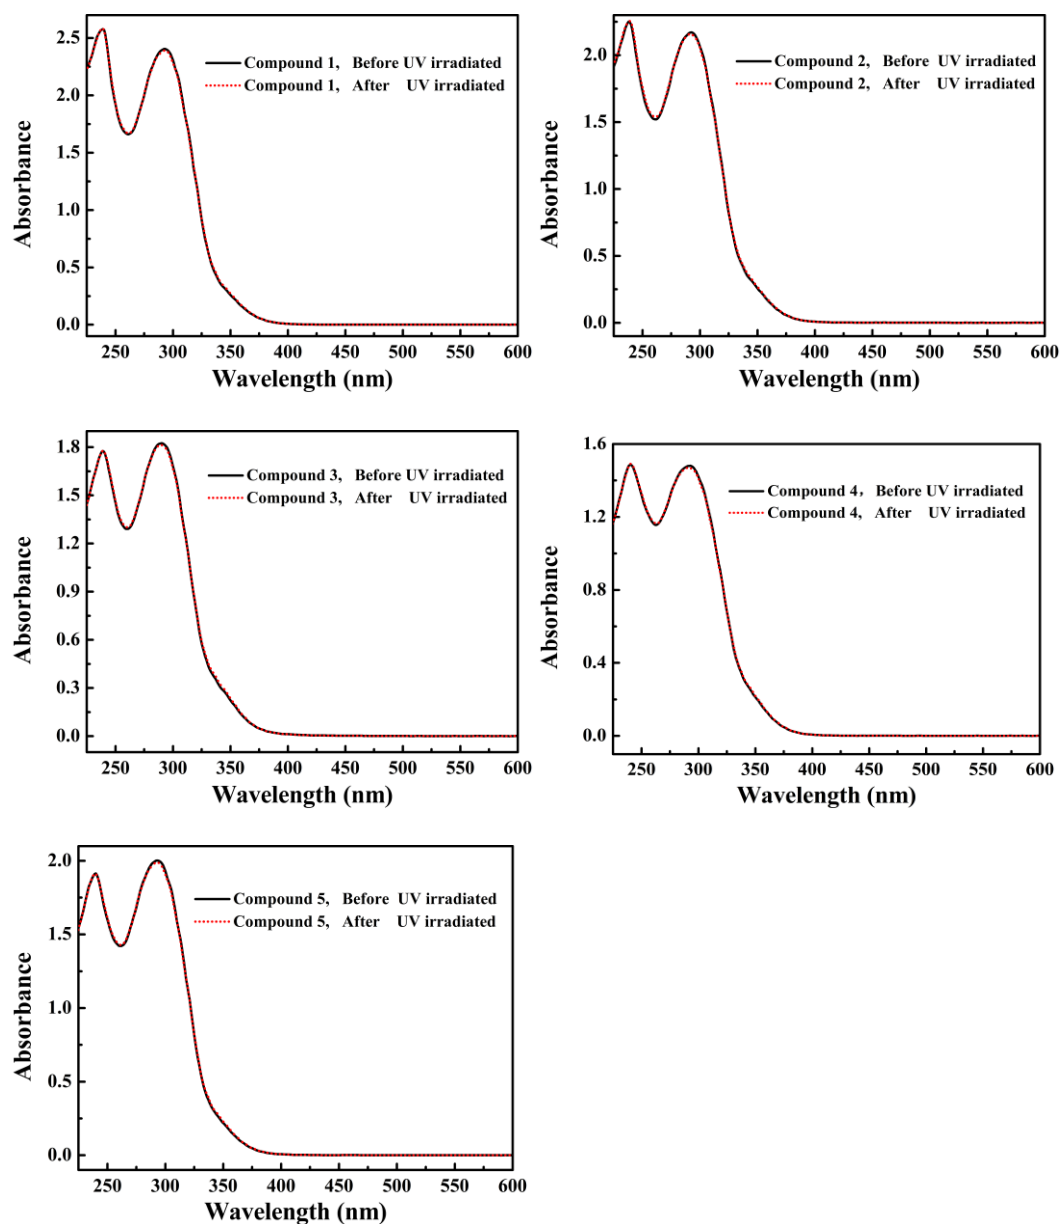

**Figure S2.** Absorption spectra of **1**, **2**, **3**, **4** and **5** before and after UV irradiated in ethanol( $3.0 \times 10^{-5}$  M).

The absorption spectra of **1**, **2**, **3**, **4** and **5** in ethanol are shown in Figure S2. Unfortunately, no absorption spectral changes were observed upon photoirradiation at any wavelength in ethanol. This result indicates that the five compounds have no photochromic properties in solution because the probability of intermolecular reaction has been reduced in the solution due to the dilution of concentrations.

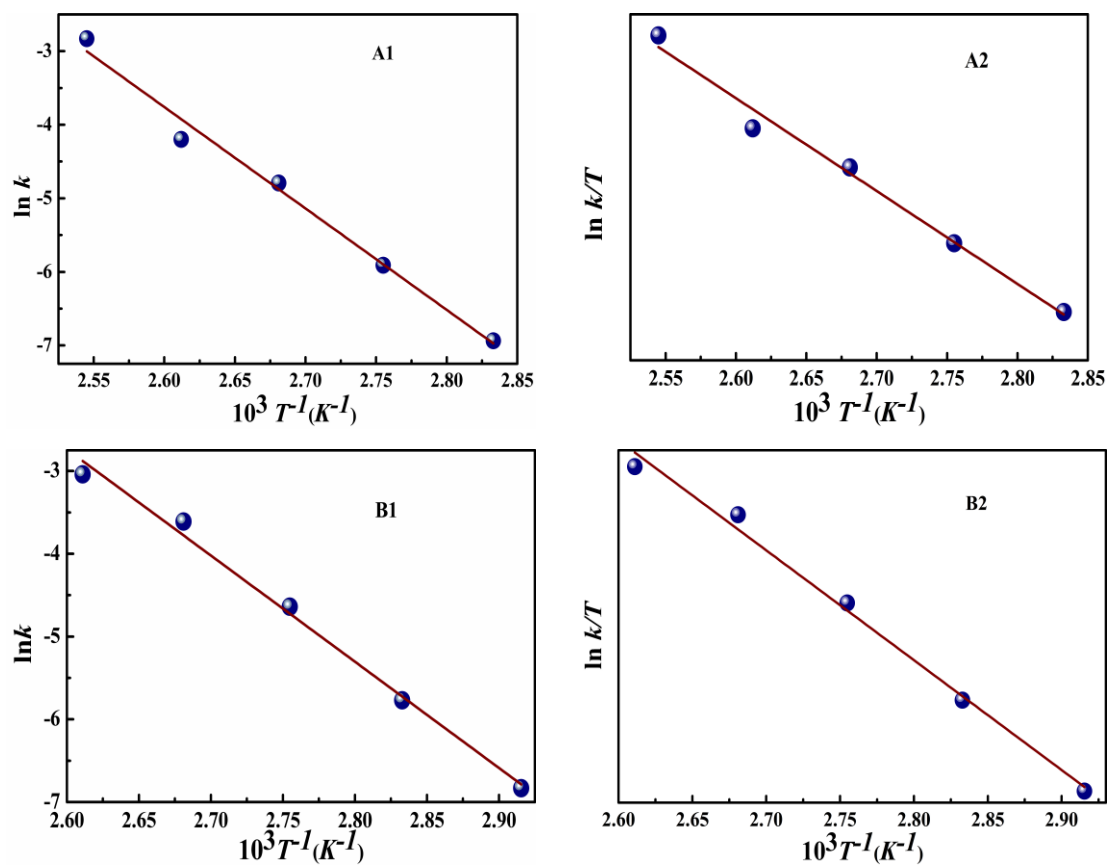

**Figure S3.** Arrhenius plots of the thermal bleaching rate constant of  $1b \rightarrow 1a$  (A1) and  $2b \rightarrow 2a$  (B1); (A2) and (B2) Eyring plots for the thermal bleaching reaction in the ranging of 353~393K for  $1b$  and 343~383K for  $2b$ .

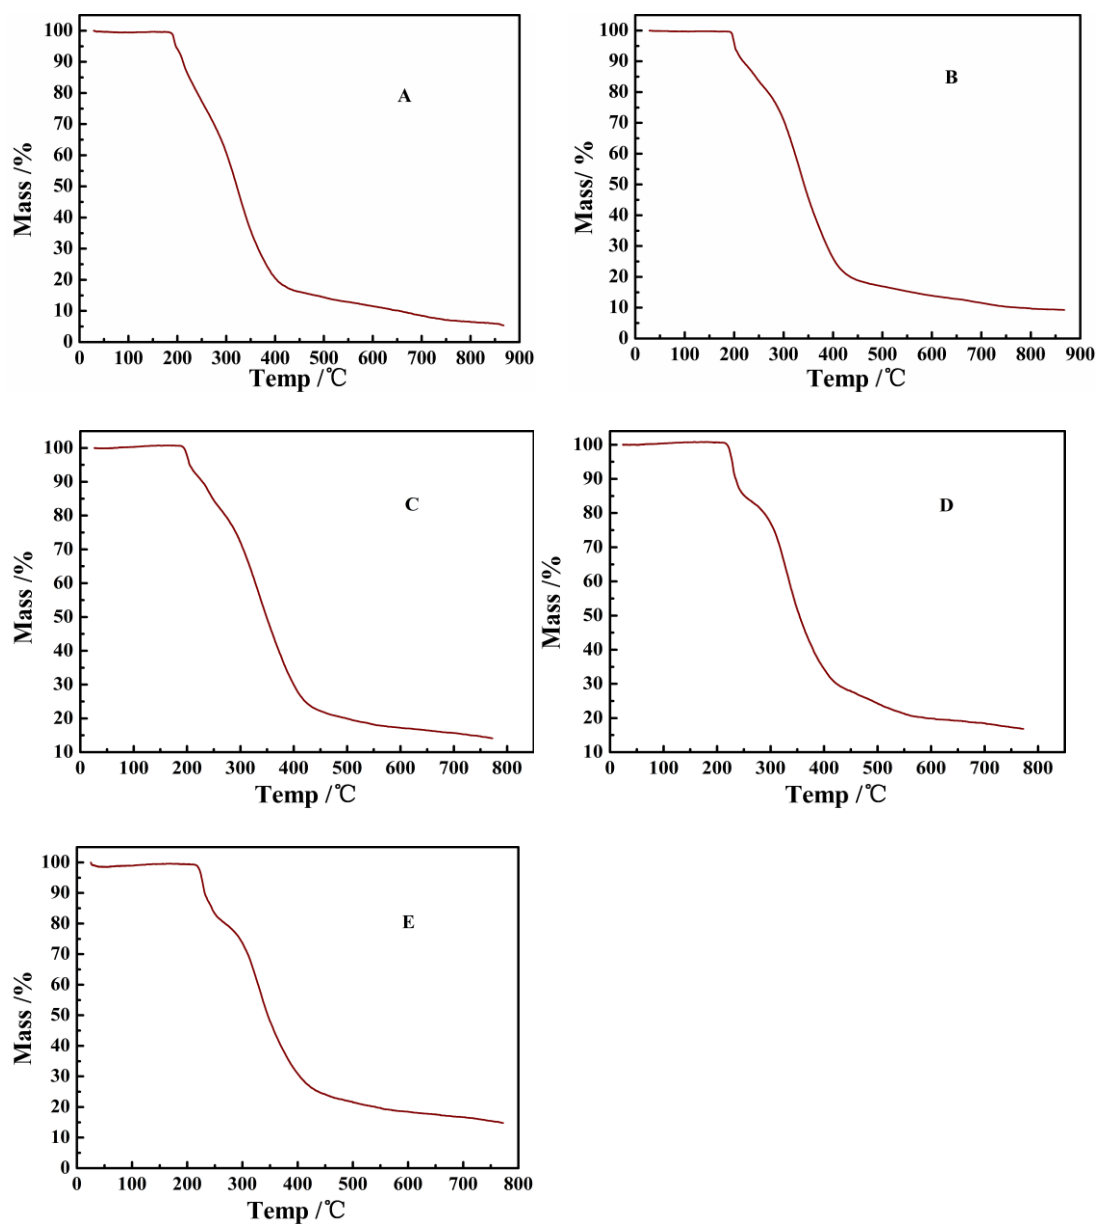

Figure S4. TGA curves of 1(A), 2(B), 3(C), 4(D) and 5(E) powder in N<sub>2</sub> atmosphere.

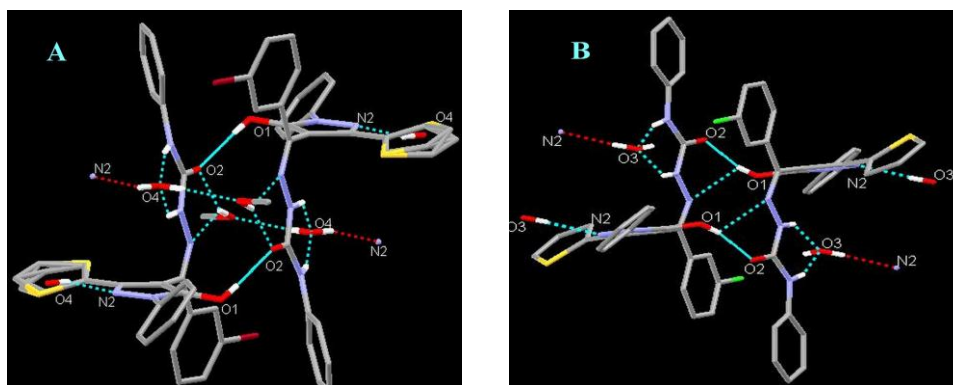

**Figure S5.** Hydrogen bond connection diagram of **1a(A)** and **2a(B)**; the other H atoms are omitted for clarity.

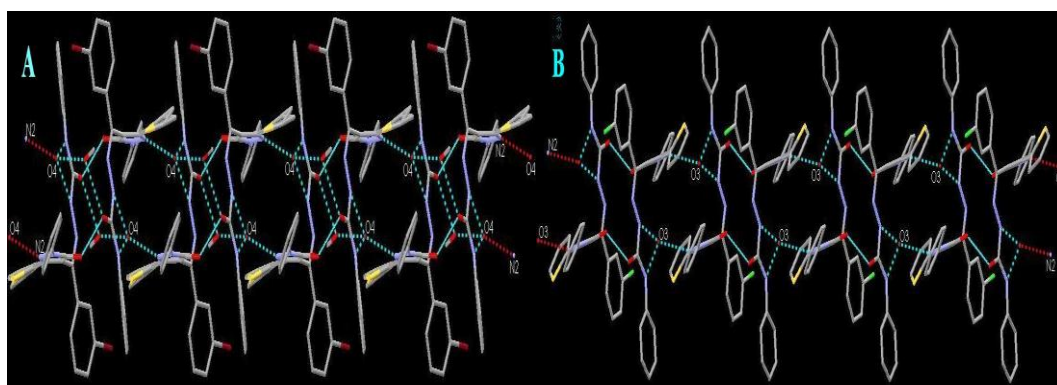

**Figure S6.** One-dimensional hydrogen-bonded chains in the crystal structure of **1a(A)** and **2a(B)**, all the H atoms are omitted for clarity.

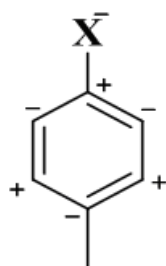

**Scheme S1.** The electron density distribution

**Table S1.** Crystal data for **1a** and **2a**.

| <b>Compound</b>                   | <b>1a</b>                                                                                    | <b>2a</b>                                                                                    |
|-----------------------------------|----------------------------------------------------------------------------------------------|----------------------------------------------------------------------------------------------|
| Empirical formula                 | C <sub>28</sub> H <sub>26</sub> Br <sub>1</sub> N <sub>5</sub> O <sub>4</sub> S <sub>1</sub> | C <sub>27</sub> H <sub>20</sub> Cl <sub>1</sub> N <sub>5</sub> O <sub>2</sub> S <sub>1</sub> |
| Wavelength                        | 0.71073 Å                                                                                    | 0.71073 Å                                                                                    |
| Crystal system                    | Triclinic                                                                                    | Monoclinic                                                                                   |
| space group                       | P-1                                                                                          | P2(1)/n                                                                                      |
| Unit cell dimensions              | a = 11.497 (2) Å                                                                             | a = 12.380 (3) Å                                                                             |
|                                   | b = 11.542 (2) Å                                                                             | b = 11.605 (2) Å                                                                             |
|                                   | c = 12.417 (3) Å                                                                             | c = 19.026 (4) Å                                                                             |
|                                   | α = 113.90 (3)°                                                                              | α = 90°                                                                                      |
|                                   | β = 106.80 (3)°                                                                              | β = 104.66(3)°                                                                               |
|                                   | γ = 99.11(3)°                                                                                | γ = 90°                                                                                      |
| Volume                            | 1368.9(5) Å <sup>3</sup>                                                                     | 2644.6(9) Å <sup>3</sup>                                                                     |
| Calculated density                | 1.476 mg/m <sup>3</sup>                                                                      | 0.334 Mg/m <sup>3</sup>                                                                      |
| Goodness-of-fit on F <sup>2</sup> | 1.080                                                                                        | 1.057                                                                                        |
| Final R indices [I > 2σ(I)]       | R1 = 0.0404, wR2 = 0.0983                                                                    | R1 = 0.0670, wR2 = 0.1671                                                                    |
| R indices (all data)              | R1 = 0.0705, wR2 = 0.1405                                                                    | R1 = 0.1096, wR2 = 0.1884                                                                    |



**Table S2.** Selected bond lengths (Å) of **1a** and **2a**.

| <b>1a</b>     |            | <b>2a</b>   |          |
|---------------|------------|-------------|----------|
| Br-C(17)      | 1.894(3)   | S-C(13)     | 1.673(5) |
| O(1)-C(9)     | 1.331(4)   | S-C(10)     | 1.690(4) |
| O(1)-H(10)    | 0.80(3)    | Cl-C(17)    | 1.744(4) |
| O(2)-C(21)    | 1.233(4)   | O(1)-C(9)   | 1.328(4) |
| O(3)-C(28)    | 1.379(6)   | O(1)-H(1A)  | 0.79(4)  |
| N(1)-C(9)     | 1.356(4)   | N(1)-C(9)   | 1.354(4) |
| N(1)-N(2)     | 1.372(4)   | N(1)-N(2)   | 1.378(3) |
| N(1)-C(6)     | 1.428(4)   | N(1)-C(6)   | 1.433(4) |
| N(2)-C(7)     | 1.333(4)   | O(2)-C(21)  | 1.229(3) |
| N(3)-C(14)    | 1.293(4)   | N(2)-C(7)   | 1.332(4) |
| N(3)-N(4)     | 1.368(4)   | C(2)-C(3)   | 1.354(7) |
| N(4)-C(21)    | 1.357(4)   | N(3)-C(14)  | 1.291(4) |
| N(5)-C(21)    | 1.356(4)   | N(3)-N(4)   | 1.363(3) |
| N(5)-C(22)    | 1.407(5)   | N(4)-C(21)  | 1.370(4) |
| C(7)-C(8)     | 1.416(4)   | N(5)-C(21)  | 1.352(4) |
| C(7)-C(10)    | 1.467(4)   | N(5)-C(22)  | 1.409(4) |
| C(8)-C(9)     | 1.370(5)   | C(7)-C(8)   | 1.410(4) |
| C(8)-C(14)    | 1.489(4)   | C(7)-C(10)  | 1.463(4) |
| C(10)-C(11)   | 1.3802(12) | C(8)-C(9)   | 1.370(4) |
| C(10)-C(11')  | 1.3802(11) | C(8)-C(14)  | 1.483(4) |
| C(10)-S'      | 1.6506(13) | C(10)-C(11) | 1.464(5) |
| C(10)-S       | 1.6519(11) | C(11)-C(12) | 1.429(6) |
| S-C(13)       | 1.6500(13) | C(12)-C(13) | 1.323(7) |
| C(11)-C(12)   | 1.4500(12) | C(14)-C(15) | 1.489(4) |
| C(12)-C(13)   | 1.3800(11) | C(15)-C(20) | 1.382(4) |
| S'-C(13')     | 1.6500(12) | C(15)-C(16) | 1.393(4) |
| C(11')-C(12') | 1.4501(13) | C(16)-C(17) | 1.377(4) |
| C(12')-C(13') | 1.3801(11) | C(17)-C(18) | 1.359(5) |
| C(14)-C(15)   | 1.483(4)   | C(18)-C(19) | 1.381(6) |
| C(15)-C(20)   | 1.373(5)   | C(19)-C(20) | 1.383(5) |
| C(15)-C(16)   | 1.407(4)   |             |          |
| C(16)-C(17)   | 1.383(5)   |             |          |
| C(17)-C(18)   | 1.381(5)   |             |          |
| C(18)-C(19)   | 1.371(5)   |             |          |
| C(19)-C(20)   | 1.395(5)   |             |          |

**Table S3.** Selected torsion angles of (°) for **1a** and **2a**.

| <b>1a</b>              |          | <b>2a</b>              |           |
|------------------------|----------|------------------------|-----------|
| N(2)-N(1)-C(6)-C(5)    | 129.2(4) | N(2)-N(1)-C(6)-C(5)    | -141.3(3) |
| C(21)-N(5)-C(22)-C(27) | -25.1(6) | C(21)-N(5)-C(22)-C(27) | 10.9(6)   |
| C(21)-N(5)-C(22)-C(23) | 159.3(4) | C(21)-N(5)-C(22)-C(23) | -171.3(3) |

**Table S4.** Hydrogen bonds for **1a** and **2a** (Å and °).

| <b>1a</b>                                           |         |          |          |        |
|-----------------------------------------------------|---------|----------|----------|--------|
| D-H...A                                             | d(D-H)  | d(H...A) | d(D...A) | <(DHA) |
| N(4)-H(4N)...O(4)#1                                 | 0.83(2) | 2.21(3)  | 2.881(4) | 138(3) |
| N(5)-H(5N)...O(4)#1                                 | 0.84(2) | 2.03(3)  | 2.844(4) | 163(3) |
| O(1)-H(1O)...O(2)#1                                 | 0.80(3) | 1.84(3)  | 2.615(3) | 162(4) |
| O(4)-H(4AO)...O(3)                                  | 0.84(3) | 1.95(3)  | 2.763(5) | 163(5) |
| O(3)-H(3O)...O(2)                                   | 0.83(3) | 2.01(4)  | 2.769(4) | 152(6) |
| O(3)-H(3O)...N(3)                                   | 0.83(3) | 2.64(5)  | 3.310(4) | 139(5) |
| O(4)-H(4BO)...N(2)#2                                | 0.84(3) | 2.07(3)  | 2.886(4) | 166(5) |
| Symmetry codes: #1 -x+1, -y+1, -z+1 ; #2 x+1, y, z  |         |          |          |        |
| <b>2a</b>                                           |         |          |          |        |
| D-H...A                                             | d(D-H)  | d(H...A) | d(D...A) | <(DHA) |
| N(4)-H(4A)...O(3)                                   | 0.88    | 2.30     | 3.058(4) | 146.4  |
| N(5)-H(5A)...O(3)                                   | 0.88    | 2.03     | 2.864(4) | 161.8  |
| O(1)-H(1A)...O(2)#1                                 | 0.79(4) | 1.80(4)  | 2.582(4) | 168(4) |
| O(3)-H(3)...N(2)#2                                  | 0.81(5) | 2.04(5)  | 2.846(4) | 175(4) |
| Symmetry codes: #1 -x+1, -y, -z ; #2 -x+1, -y+1, -z |         |          |          |        |

**Results of Time-Dependent DFT Calculations:  
b3lyp/6-31+g(d) (states=20) in the gas phase**

**1a**

Excitation energies and oscillator strengths:

|                  |           |           |           |          |
|------------------|-----------|-----------|-----------|----------|
| Excited State 1: | Singlet-A | 3.6010 eV | 344.31 nm | f=0.0622 |
| 141 ->143        | 0.60149   |           |           |          |
| 142 ->143        | 0.36393   |           |           |          |

This state for optimization and/or second-order correction.

Copying the excited state density for this state as the 1-particle RhoCI density.

|                  |           |           |           |          |
|------------------|-----------|-----------|-----------|----------|
| Excited State 2: | Singlet-A | 3.6547 eV | 339.24 nm | f=0.3456 |
| 141 ->143        | -0.35889  |           |           |          |
| 142 ->143        | 0.59003   |           |           |          |
| 142 ->144        | 0.10885   |           |           |          |

|                  |           |           |           |          |
|------------------|-----------|-----------|-----------|----------|
| Excited State 3: | Singlet-A | 3.8889 eV | 318.81 nm | f=0.0964 |
| 140 ->144        | -0.11405  |           |           |          |
| 142 ->144        | 0.68325   |           |           |          |

|                  |           |           |           |          |
|------------------|-----------|-----------|-----------|----------|
| Excited State 4: | Singlet-A | 4.0708 eV | 304.57 nm | f=0.1613 |
| 139 ->143        | 0.11684   |           |           |          |
| 140 ->143        | -0.46000  |           |           |          |
| 141 ->144        | 0.49453   |           |           |          |

|                  |           |           |           |          |
|------------------|-----------|-----------|-----------|----------|
| Excited State 5: | Singlet-A | 4.1582 eV | 298.16 nm | f=0.3882 |
| 140 ->143        | 0.46506   |           |           |          |
| 141 ->144        | 0.48643   |           |           |          |

|                  |           |           |           |          |
|------------------|-----------|-----------|-----------|----------|
| Excited State 6: | Singlet-A | 4.2942 eV | 288.72 nm | f=0.0084 |
| 137 ->143        | 0.14972   |           |           |          |
| 139 ->143        | 0.55846   |           |           |          |
| 140 ->145        | 0.18088   |           |           |          |
| 142 ->145        | -0.30948  |           |           |          |

|                  |           |           |           |          |
|------------------|-----------|-----------|-----------|----------|
| Excited State 7: | Singlet-A | 4.3814 eV | 282.98 nm | f=0.0047 |
| 137 ->143        | -0.15823  |           |           |          |
| 140 ->144        | 0.65895   |           |           |          |
| 142 ->144        | 0.12551   |           |           |          |

|                  |           |           |           |          |
|------------------|-----------|-----------|-----------|----------|
| Excited State 8: | Singlet-A | 4.5019 eV | 275.41 nm | f=0.2501 |
| 135 ->143        | -0.21780  |           |           |          |
| 136 ->143        | -0.12188  |           |           |          |
| 137 ->143        | 0.51082   |           |           |          |
| 138 ->143        | 0.12264   |           |           |          |
| 139 ->143        | -0.19223  |           |           |          |
| 140 ->143        | -0.20575  |           |           |          |
| 140 ->144        | 0.20284   |           |           |          |
| 142 ->145        | -0.11372  |           |           |          |

|                  |           |           |           |          |
|------------------|-----------|-----------|-----------|----------|
| Excited State 9: | Singlet-A | 4.6219 eV | 268.25 nm | f=0.0062 |
|------------------|-----------|-----------|-----------|----------|

|                   |           |           |           |          |
|-------------------|-----------|-----------|-----------|----------|
| 137 ->143         | -0.12566  |           |           |          |
| 138 ->143         | 0.65278   |           |           |          |
| 142 ->149         | 0.16179   |           |           |          |
| 142 ->151         | 0.10456   |           |           |          |
| Excited State 10: | Singlet-A | 4.6469 eV | 266.81 nm | f=0.0517 |
| 137 ->143         | 0.11617   |           |           |          |
| 139 ->143         | 0.18659   |           |           |          |
| 141 ->145         | 0.18386   |           |           |          |
| 142 ->145         | 0.48467   |           |           |          |
| 142 ->146         | 0.37363   |           |           |          |
| Excited State 11: | Singlet-A | 4.6982 eV | 263.90 nm | f=0.0576 |
| 137 ->143         | -0.23627  |           |           |          |
| 139 ->143         | -0.16130  |           |           |          |
| 141 ->145         | -0.10029  |           |           |          |
| 142 ->145         | -0.28915  |           |           |          |
| 142 ->146         | 0.51101   |           |           |          |
| 142 ->148         | 0.11169   |           |           |          |
| Excited State 12: | Singlet-A | 4.6985 eV | 263.88 nm | f=0.0236 |
| 141 ->145         | 0.59972   |           |           |          |
| 141 ->146         | 0.22413   |           |           |          |
| 142 ->145         | -0.15573  |           |           |          |
| Excited State 13: | Singlet-A | 4.7532 eV | 260.85 nm | f=0.0115 |
| 134 ->144         | -0.18575  |           |           |          |
| 134 ->146         | 0.11553   |           |           |          |
| 136 ->143         | 0.15454   |           |           |          |
| 141 ->145         | 0.23833   |           |           |          |
| 141 ->146         | -0.32930  |           |           |          |
| 141 ->147         | 0.43804   |           |           |          |
| 142 ->147         | 0.15849   |           |           |          |
| Excited State 14: | Singlet-A | 4.7585 eV | 260.55 nm | f=0.0317 |
| 134 ->144         | -0.14590  |           |           |          |
| 136 ->143         | -0.14348  |           |           |          |
| 136 ->144         | -0.10273  |           |           |          |
| 141 ->145         | -0.15765  |           |           |          |
| 141 ->146         | 0.46780   |           |           |          |
| 141 ->147         | 0.38500   |           |           |          |
| 142 ->147         | 0.10220   |           |           |          |
| Excited State 15: | Singlet-A | 4.7660 eV | 260.14 nm | f=0.0472 |
| 135 ->143         | 0.56393   |           |           |          |
| 136 ->143         | -0.28455  |           |           |          |
| 137 ->143         | 0.15704   |           |           |          |
| Excited State 16: | Singlet-A | 4.7826 eV | 259.24 nm | f=0.0078 |
| 133 ->143         | 0.17469   |           |           |          |
| 135 ->143         | 0.24700   |           |           |          |

|                   |           |           |           |          |              |
|-------------------|-----------|-----------|-----------|----------|--------------|
| 136 ->143         | 0.54982   |           |           |          |              |
| 137 ->143         | 0.18030   |           |           |          |              |
| 141 ->146         | 0.20471   |           |           |          |              |
| Excited State 17: | Singlet-A | 4.8216 eV | 257.15 nm | f=0.0109 | <S**2>=0.000 |
| 141 ->147         | -0.13026  |           |           |          |              |
| 142 ->146         | -0.16386  |           |           |          |              |
| 142 ->147         | 0.27348   |           |           |          |              |
| 142 ->148         | 0.51905   |           |           |          |              |
| 142 ->150         | 0.21938   |           |           |          |              |
| 142 ->152         | 0.13821   |           |           |          |              |
| Excited State 18: | Singlet-A | 4.8519 eV | 255.54 nm | f=0.0153 |              |
| 137 ->144         | -0.35196  |           |           |          |              |
| 139 ->144         | 0.56432   |           |           |          |              |
| 141 ->146         | 0.11541   |           |           |          |              |
| Excited State 19: | Singlet-A | 4.8631 eV | 254.95 nm | f=0.0032 |              |
| 133 ->143         | 0.65133   |           |           |          |              |
| 136 ->143         | -0.20344  |           |           |          |              |
| Excited State 20: | Singlet-A | 4.9412 eV | 250.92 nm | f=0.0036 |              |
| 138 ->143         | -0.12061  |           |           |          |              |
| 138 ->144         | -0.10595  |           |           |          |              |
| 138 ->151         | -0.10585  |           |           |          |              |
| 140 ->147         | -0.11049  |           |           |          |              |
| 141 ->147         | -0.15105  |           |           |          |              |
| 141 ->148         | -0.10144  |           |           |          |              |
| 142 ->147         | 0.47843   |           |           |          |              |
| 142 ->148         | -0.25776  |           |           |          |              |
| 142 ->149         | 0.24380   |           |           |          |              |
| 142 ->150         | -0.13211  |           |           |          |              |
| 142 ->151         | 0.10997   |           |           |          |              |

### 1b

Excitation energies and oscillator strengths:

|                  |           |           |           |          |  |
|------------------|-----------|-----------|-----------|----------|--|
| Excited State 1: | Singlet-A | 3.6058 eV | 343.85 nm | f=0.0769 |  |
| 132 ->134        | 0.58470   |           |           |          |  |
| 133 ->134        | 0.39015   |           |           |          |  |

This state for optimization and/or second-order correction.

Copying the excited state density for this state as the 1-particle RhoCI density.

|                  |           |           |           |          |  |
|------------------|-----------|-----------|-----------|----------|--|
| Excited State 2: | Singlet-A | 3.6551 eV | 339.21 nm | f=0.3296 |  |
| 132 ->134        | -0.38551  |           |           |          |  |
| 133 ->134        | 0.57229   |           |           |          |  |
| 133 ->135        | -0.11296  |           |           |          |  |
| Excited State 3: | Singlet-A | 3.8868 eV | 318.99 nm | f=0.0994 |  |
| 131 ->135        | -0.11262  |           |           |          |  |
| 133 ->135        | 0.68262   |           |           |          |  |
| Excited State 4: | Singlet-A | 4.0756 eV | 304.21 nm | f=0.1538 |  |

|                   |           |           |           |          |  |
|-------------------|-----------|-----------|-----------|----------|--|
| 129 ->134         | -0.14429  |           |           |          |  |
| 131 ->134         | 0.46597   |           |           |          |  |
| 132 ->135         | 0.48895   |           |           |          |  |
| Excited State 5:  | Singlet-A | 4.1646 eV | 297.71 nm | f=0.3981 |  |
| 129 ->134         | 0.13326   |           |           |          |  |
| 131 ->134         | -0.45965  |           |           |          |  |
| 132 ->135         | 0.49208   |           |           |          |  |
| Excited State 6:  | Singlet-A | 4.3617 eV | 284.26 nm | f=0.0181 |  |
| 128 ->134         | -0.33154  |           |           |          |  |
| 129 ->134         | 0.41568   |           |           |          |  |
| 131 ->135         | -0.13411  |           |           |          |  |
| 131 ->136         | -0.18433  |           |           |          |  |
| 133 ->136         | 0.32764   |           |           |          |  |
| 133 ->137         | -0.11475  |           |           |          |  |
| Excited State 7:  | Singlet-A | 4.3849 eV | 282.75 nm | f=0.0018 |  |
| 128 ->134         | -0.15987  |           |           |          |  |
| 131 ->135         | 0.64687   |           |           |          |  |
| 133 ->135         | 0.11934   |           |           |          |  |
| 133 ->136         | 0.12937   |           |           |          |  |
| Excited State 8:  | Singlet-A | 4.5086 eV | 274.99 nm | f=0.2407 |  |
| 126 ->134         | 0.23670   |           |           |          |  |
| 127 ->134         | 0.10615   |           |           |          |  |
| 128 ->134         | 0.32516   |           |           |          |  |
| 129 ->134         | 0.40114   |           |           |          |  |
| 130 ->134         | -0.16453  |           |           |          |  |
| 131 ->134         | 0.20135   |           |           |          |  |
| 131 ->135         | 0.19838   |           |           |          |  |
| 133 ->136         | -0.15063  |           |           |          |  |
| Excited State 9:  | Singlet-A | 4.6231 eV | 268.18 nm | f=0.0055 |  |
| 129 ->134         | 0.17709   |           |           |          |  |
| 130 ->134         | 0.63776   |           |           |          |  |
| 133 ->140         | -0.16841  |           |           |          |  |
| 133 ->141         | 0.10696   |           |           |          |  |
| Excited State 10: | Singlet-A | 4.6565 eV | 266.26 nm | f=0.0629 |  |
| 131 ->137         | -0.11475  |           |           |          |  |
| 132 ->136         | 0.13760   |           |           |          |  |
| 133 ->136         | 0.36876   |           |           |          |  |
| 133 ->137         | 0.52463   |           |           |          |  |
| Excited State 11: | Singlet-A | 4.7144 eV | 262.99 nm | f=0.0249 |  |
| 126 ->135         | -0.10235  |           |           |          |  |
| 132 ->136         | 0.55624   |           |           |          |  |
| 132 ->137         | 0.27735   |           |           |          |  |
| 132 ->138         | -0.10570  |           |           |          |  |
| 133 ->137         | -0.19969  |           |           |          |  |

|                   |           |           |           |          |
|-------------------|-----------|-----------|-----------|----------|
| Excited State 12: | Singlet-A | 4.7424 eV | 261.44 nm | f=0.0567 |
| 126 ->134         | -0.24774  |           |           |          |
| 128 ->134         | 0.41614   |           |           |          |
| 132 ->137         | -0.22669  |           |           |          |
| 133 ->136         | 0.35352   |           |           |          |
| 133 ->137         | -0.21220  |           |           |          |
| Excited State 13: | Singlet-A | 4.7553 eV | 260.73 nm | f=0.0118 |
| 125 ->135         | -0.22567  |           |           |          |
| 125 ->137         | 0.13400   |           |           |          |
| 132 ->137         | 0.10805   |           |           |          |
| 132 ->138         | 0.57269   |           |           |          |
| 133 ->138         | 0.18610   |           |           |          |
| Excited State 14: | Singlet-A | 4.7678 eV | 260.05 nm | f=0.0512 |
| 124 ->134         | 0.13571   |           |           |          |
| 126 ->134         | -0.32759  |           |           |          |
| 127 ->134         | 0.40245   |           |           |          |
| 132 ->136         | -0.22944  |           |           |          |
| 132 ->137         | 0.32091   |           |           |          |
| 133 ->136         | -0.10667  |           |           |          |
| Excited State 15: | Singlet-A | 4.7765 eV | 259.57 nm | f=0.0055 |
| 126 ->134         | 0.35265   |           |           |          |
| 129 ->134         | -0.16247  |           |           |          |
| 132 ->136         | -0.27787  |           |           |          |
| 132 ->137         | 0.31755   |           |           |          |
| 133 ->136         | 0.19638   |           |           |          |
| 133 ->137         | -0.14943  |           |           |          |
| 133 ->138         | -0.10725  |           |           |          |
| 133 ->139         | -0.24132  |           |           |          |
| Excited State 16: | Singlet-A | 4.7865 eV | 259.03 nm | f=0.0085 |
| 124 ->134         | 0.17845   |           |           |          |
| 126 ->134         | 0.24299   |           |           |          |
| 127 ->134         | 0.49289   |           |           |          |
| 128 ->134         | -0.11687  |           |           |          |
| 129 ->134         | -0.15785  |           |           |          |
| 132 ->136         | 0.11341   |           |           |          |
| 132 ->137         | -0.30114  |           |           |          |
| Excited State 17: | Singlet-A | 4.8179 eV | 257.34 nm | f=0.0194 |
| 126 ->134         | 0.16966   |           |           |          |
| 132 ->138         | -0.13013  |           |           |          |
| 133 ->136         | 0.10105   |           |           |          |
| 133 ->137         | -0.23121  |           |           |          |
| 133 ->138         | 0.26336   |           |           |          |
| 133 ->139         | 0.49820   |           |           |          |
| 133 ->142         | 0.15211   |           |           |          |

|                   |           |           |           |          |
|-------------------|-----------|-----------|-----------|----------|
| Excited State 18: | Singlet-A | 4.8617 eV | 255.02 nm | f=0.0054 |
| 124 ->134         | 0.64605   |           |           |          |
| 127 ->134         | -0.22465  |           |           |          |
| Excited State 19: | Singlet-A | 4.8681 eV | 254.69 nm | f=0.0216 |
| 128 ->135         | 0.12071   |           |           |          |
| 129 ->135         | 0.63658   |           |           |          |
| 130 ->135         | -0.16381  |           |           |          |
| Excited State 20: | Singlet-A | 4.9341 eV | 251.28 nm | f=0.0019 |
| 131 ->138         | -0.12412  |           |           |          |
| 132 ->138         | -0.16629  |           |           |          |
| 133 ->138         | 0.54165   |           |           |          |
| 133 ->139         | -0.30838  |           |           |          |
| 133 ->140         | 0.13396   |           |           |          |

## 2a

Excitation energies and oscillator strengths:

|                  |           |           |           |          |
|------------------|-----------|-----------|-----------|----------|
| Excited State 1: | Singlet-A | 2.7628 eV | 448.76 nm | f=0.0691 |
| 132 ->134        | 0.13069   |           |           |          |
| 133 ->134        | 0.69104   |           |           |          |

This state for optimization and/or second-order correction.

Copying the excited state density for this state as the 1-particle RhoCI density.

|                  |           |           |           |          |
|------------------|-----------|-----------|-----------|----------|
| Excited State 2: | Singlet-A | 3.2895 eV | 376.91 nm | f=0.0061 |
| 132 ->134        | 0.68565   |           |           |          |
| 133 ->134        | -0.13818  |           |           |          |
| Excited State 3: | Singlet-A | 3.6179 eV | 342.69 nm | f=0.2300 |
| 131 ->134        | 0.70065   |           |           |          |
| Excited State 4: | Singlet-A | 3.7231 eV | 333.01 nm | f=0.0902 |
| 130 ->134        | 0.66886   |           |           |          |
| 133 ->135        | -0.19549  |           |           |          |
| Excited State 5: | Singlet-A | 3.7940 eV | 326.79 nm | f=0.3958 |
| 130 ->134        | 0.20031   |           |           |          |
| 133 ->135        | 0.66561   |           |           |          |
| Excited State 6: | Singlet-A | 3.9903 eV | 310.71 nm | f=0.0010 |
| 129 ->134        | 0.70496   |           |           |          |
| Excited State 7: | Singlet-A | 4.0307 eV | 307.60 nm | f=0.1334 |
| 128 ->134        | 0.68017   |           |           |          |
| Excited State 8: | Singlet-A | 4.1953 eV | 295.53 nm | f=0.0033 |
| 124 ->134        | -0.10742  |           |           |          |
| 126 ->134        | -0.13157  |           |           |          |
| 127 ->134        | 0.65785   |           |           |          |
| Excited State 9: | Singlet-A | 4.3013 eV | 288.25 nm | f=0.0318 |
| 132 ->135        | -0.20013  |           |           |          |
| 132 ->136        | 0.12624   |           |           |          |
| 133 ->136        | 0.63479   |           |           |          |
| 133 ->137        | 0.13611   |           |           |          |



|                   |           |           |           |          |
|-------------------|-----------|-----------|-----------|----------|
| Excited State 10: | Singlet-A | 4.3087 eV | 287.75 nm | f=0.0279 |
| 132 ->135         | 0.64270   |           |           |          |
| 133 ->136         | 0.19815   |           |           |          |
| Excited State 11: | Singlet-A | 4.4009 eV | 281.72 nm | f=0.0178 |
| 122 ->134         | -0.13172  |           |           |          |
| 124 ->134         | 0.21158   |           |           |          |
| 125 ->134         | -0.23996  |           |           |          |
| 126 ->134         | 0.51977   |           |           |          |
| 127 ->134         | 0.19494   |           |           |          |
| 133 ->136         | 0.10798   |           |           |          |
| 133 ->137         | -0.15122  |           |           |          |
| Excited State 12: | Singlet-A | 4.4251 eV | 280.19 nm | f=0.0049 |
| 126 ->134         | 0.11468   |           |           |          |
| 133 ->136         | -0.11748  |           |           |          |
| 133 ->137         | 0.66868   |           |           |          |
| Excited State 13: | Singlet-A | 4.4745 eV | 277.09 nm | f=0.0096 |
| 124 ->134         | 0.11619   |           |           |          |
| 125 ->134         | 0.10972   |           |           |          |
| 130 ->135         | 0.39938   |           |           |          |
| 131 ->135         | 0.25774   |           |           |          |
| 132 ->139         | -0.18141  |           |           |          |
| 133 ->139         | -0.37673  |           |           |          |
| 133 ->140         | 0.14706   |           |           |          |
| Excited State 14: | Singlet-A | 4.5178 eV | 274.43 nm | f=0.0415 |
| 124 ->134         | 0.22451   |           |           |          |
| 125 ->134         | 0.58933   |           |           |          |
| 126 ->134         | 0.17599   |           |           |          |
| 130 ->135         | -0.11493  |           |           |          |
| 131 ->137         | 0.10849   |           |           |          |
| 133 ->139         | 0.10254   |           |           |          |
| Excited State 15: | Singlet-A | 4.5469 eV | 272.68 nm | f=0.0262 |
| 122 ->134         | -0.18955  |           |           |          |
| 123 ->134         | 0.16178   |           |           |          |
| 124 ->134         | 0.46650   |           |           |          |
| 125 ->134         | -0.14750  |           |           |          |
| 126 ->134         | -0.33209  |           |           |          |
| 131 ->135         | 0.13626   |           |           |          |
| 131 ->137         | -0.14075  |           |           |          |
| Excited State 16: | Singlet-A | 4.5796 eV | 270.73 nm | f=0.0520 |
| 124 ->134         | -0.11886  |           |           |          |
| 130 ->135         | -0.12728  |           |           |          |
| 131 ->135         | 0.62173   |           |           |          |
| 133 ->138         | -0.15196  |           |           |          |
| 133 ->139         | 0.12350   |           |           |          |

|                   |           |           |           |          |
|-------------------|-----------|-----------|-----------|----------|
| Excited State 17: | Singlet-A | 4.6487 eV | 266.70 nm | f=0.0199 |
| 122 ->134         | 0.15270   |           |           |          |
| 123 ->134         | 0.10296   |           |           |          |
| 131 ->135         | 0.10306   |           |           |          |
| 132 ->138         | 0.13631   |           |           |          |
| 133 ->138         | 0.61955   |           |           |          |
| 133 ->139         | 0.13005   |           |           |          |
| Excited State 18: | Singlet-A | 4.7214 eV | 262.60 nm | f=0.0137 |
| 123 ->134         | 0.59514   |           |           |          |
| 124 ->134         | -0.16661  |           |           |          |
| 133 ->138         | -0.14675  |           |           |          |
| 133 ->140         | -0.18650  |           |           |          |
| Excited State 19: | Singlet-A | 4.7426 eV | 261.43 nm | f=0.0167 |
| 122 ->134         | -0.14052  |           |           |          |
| 123 ->134         | 0.19295   |           |           |          |
| 124 ->134         | -0.10670  |           |           |          |
| 132 ->140         | 0.11513   |           |           |          |
| 133 ->139         | 0.26339   |           |           |          |
| 133 ->140         | 0.55184   |           |           |          |
| Excited State 20: | Singlet-A | 4.7860 eV | 259.06 nm | f=0.0985 |
| 128 ->135         | 0.12235   |           |           |          |
| 129 ->135         | -0.27446  |           |           |          |
| 129 ->143         | -0.10420  |           |           |          |
| 130 ->135         | 0.32839   |           |           |          |
| 132 ->136         | 0.14671   |           |           |          |
| 133 ->139         | 0.31283   |           |           |          |
| 133 ->140         | -0.10476  |           |           |          |
| 133 ->142         | 0.32823   |           |           |          |

## 2b

Excitation energies and oscillator strengths:

|                  |           |           |           |          |
|------------------|-----------|-----------|-----------|----------|
| Excited State 1: | Singlet-A | 2.7557 eV | 449.92 nm | f=0.0711 |
| 141 ->143        | 0.12803   |           |           |          |
| 142 ->143        | 0.69150   |           |           |          |

This state for optimization and/or second-order correction.

Copying the excited state density for this state as the 1-particle RhoCI density.

|                  |           |           |           |          |
|------------------|-----------|-----------|-----------|----------|
| Excited State 2: | Singlet-A | 3.2803 eV | 377.96 nm | f=0.0062 |
| 141 ->143        | 0.68577   |           |           |          |
| 142 ->143        | -0.13562  |           |           |          |
| Excited State 3: | Singlet-A | 3.6000 eV | 344.40 nm | f=0.2026 |
| 140 ->143        | 0.69320   |           |           |          |
| Excited State 4: | Singlet-A | 3.6513 eV | 339.56 nm | f=0.0718 |
| 139 ->143        | 0.69048   |           |           |          |
| Excited State 5: | Singlet-A | 3.7848 eV | 327.58 nm | f=0.4402 |
| 142 ->144        | 0.68876   |           |           |          |

|                   |           |           |           |          |
|-------------------|-----------|-----------|-----------|----------|
| Excited State 6:  | Singlet-A | 3.9811 eV | 311.43 nm | f=0.0011 |
| 138 ->143         | 0.70610   |           |           |          |
| Excited State 7:  | Singlet-A | 4.0197 eV | 308.44 nm | f=0.1344 |
| 137 ->143         | 0.68014   |           |           |          |
| Excited State 8:  | Singlet-A | 4.1841 eV | 296.32 nm | f=0.0032 |
| 133 ->143         | -0.10197  |           |           |          |
| 135 ->143         | -0.13083  |           |           |          |
| 136 ->143         | 0.65969   |           |           |          |
| Excited State 9:  | Singlet-A | 4.3014 eV | 288.24 nm | f=0.0479 |
| 141 ->144         | 0.54163   |           |           |          |
| 142 ->145         | 0.39213   |           |           |          |
| 142 ->146         | -0.10666  |           |           |          |
| Excited State 10: | Singlet-A | 4.3050 eV | 288.00 nm | f=0.0094 |
| 141 ->144         | -0.39616  |           |           |          |
| 141 ->145         | 0.10705   |           |           |          |
| 142 ->145         | 0.53338   |           |           |          |
| Excited State 11: | Singlet-A | 4.3917 eV | 282.31 nm | f=0.0190 |
| 130 ->143         | 0.12840   |           |           |          |
| 133 ->143         | 0.21425   |           |           |          |
| 134 ->143         | -0.23369  |           |           |          |
| 135 ->143         | 0.53132   |           |           |          |
| 136 ->143         | 0.19316   |           |           |          |
| 142 ->146         | -0.10057  |           |           |          |
| Excited State 12: | Singlet-A | 4.4249 eV | 280.20 nm | f=0.0084 |
| 139 ->144         | -0.23951  |           |           |          |
| 140 ->144         | 0.14096   |           |           |          |
| 142 ->146         | 0.56506   |           |           |          |
| 142 ->147         | -0.19148  |           |           |          |
| 142 ->148         | 0.12020   |           |           |          |
| Excited State 13: | Singlet-A | 4.4266 eV | 280.09 nm | f=0.0004 |
| 139 ->144         | 0.35506   |           |           |          |
| 140 ->144         | -0.22655  |           |           |          |
| 141 ->147         | 0.13382   |           |           |          |
| 142 ->145         | 0.13221   |           |           |          |
| 142 ->146         | 0.37226   |           |           |          |
| 142 ->147         | 0.28098   |           |           |          |
| 142 ->148         | -0.17061  |           |           |          |
| Excited State 14: | Singlet-A | 4.5019 eV | 275.41 nm | f=0.0417 |
| 131 ->143         | 0.10264   |           |           |          |
| 133 ->143         | 0.25284   |           |           |          |
| 134 ->143         | 0.59320   |           |           |          |
| 135 ->143         | 0.14798   |           |           |          |
| Excited State 15: | Singlet-A | 4.5350 eV | 273.39 nm | f=0.0233 |
| 130 ->143         | 0.17969   |           |           |          |

|                   |           |           |           |          |
|-------------------|-----------|-----------|-----------|----------|
| 131 ->143         | 0.17096   |           |           |          |
| 133 ->143         | 0.46084   |           |           |          |
| 134 ->143         | -0.18126  |           |           |          |
| 135 ->143         | -0.33925  |           |           |          |
| 140 ->144         | -0.13138  |           |           |          |
| 140 ->146         | 0.13735   |           |           |          |
| Excited State 16: | Singlet-A | 4.5707 eV | 271.26 nm | f=0.0585 |
| 133 ->143         | 0.11861   |           |           |          |
| 139 ->144         | 0.17614   |           |           |          |
| 140 ->144         | 0.61858   |           |           |          |
| 142 ->147         | 0.17789   |           |           |          |
| Excited State 17: | Singlet-A | 4.6488 eV | 266.70 nm | f=0.0222 |
| 130 ->143         | -0.15195  |           |           |          |
| 132 ->143         | 0.12534   |           |           |          |
| 141 ->148         | 0.12462   |           |           |          |
| 142 ->147         | 0.36720   |           |           |          |
| 142 ->148         | 0.51003   |           |           |          |
| Excited State 18: | Singlet-A | 4.7072 eV | 263.40 nm | f=0.0149 |
| 131 ->143         | 0.22685   |           |           |          |
| 132 ->143         | 0.55151   |           |           |          |
| 139 ->144         | 0.16023   |           |           |          |
| 142 ->147         | -0.22132  |           |           |          |
| 142 ->149         | -0.11743  |           |           |          |
| Excited State 19: | Singlet-A | 4.7312 eV | 262.06 nm | f=0.0929 |
| 130 ->143         | 0.10119   |           |           |          |
| 139 ->144         | 0.33412   |           |           |          |
| 142 ->147         | -0.28496  |           |           |          |
| 142 ->148         | 0.34655   |           |           |          |
| 142 ->149         | 0.34413   |           |           |          |
| Excited State 20: | Singlet-A | 4.7455 eV | 261.27 nm | f=0.0247 |
| 130 ->143         | 0.11326   |           |           |          |
| 132 ->143         | 0.23238   |           |           |          |
| 139 ->144         | -0.24127  |           |           |          |
| 142 ->147         | 0.13660   |           |           |          |
| 142 ->148         | -0.14051  |           |           |          |
| 142 ->149         | 0.51232   |           |           |          |
